# Supplementary material
Source: publisher figshare collection journal article supplement (https://karger.figshare.com/ndownloader/files/17819915)
Supplement: Supplementary file 1 [file 17819915]

**Figure S1**

Representative electrophoresis image of total RNA obtained by EUS-FNA. The integrity of the RNA samples purified was examined using an Agilent 2100 Bioanalyzer and RNA 6000 LabChip Kit (Agilent Technologies). Distinct peaks representing of 18S and 28S rRNAs were observed in this sample, indicating good RNA quality.

**Figure S2**

Kaplan-Meier survival curves for 13 PDAC patients plotted for (A) miR-296-5p and (B) miR-1207-5p. Kaplan-Meier survival curves were analyzed with GraphPad Prism V8.0. The p value was calculated using the log-rank test for 13 patients with high- and low-expression of miR-296-5p and miR-1207-5p. p<0.05 indicates a significant difference between groups.

**Figure S3**

Levels of mRNA expression for candidate target genes in pancreatic cancer cell lines transfected with miR-296-5p or miR-1207 mimic. (A) *BOK* and *NUMBL* mRNA levels in PANC-1, MIA PaCa-2, and PK-8 cells transfected with miR-296-5p or control mimic were determined by Taqman qPCR. (B) CD276 and ATP11A mRNA levels in PANC-1, MIA PaCa-2, and PK-8 cells transfected with 1207-5p or control mimic were determined by Taman qPCR. Data are expressed as ratios relative to control cells. NC; negative control.

**Figure S4**

The targeted sequences of miR-296-5p in the 3’-untranslated region (UTR) of the *BOK* gene. The nucleotide sequences in the 3’-UTR of *BOK* that matched the miR-296-5p sequence were examined using the miRDB. Seven core sequence of mature miR-296-5p (GGGGCCC) was found at 17 sites and is shown in blue.

**Figure S5**

Cell invasion capability induced by transfection of miR-296-5p in PK-1 cells. The invasion capability of cells transfected with miR-296-5p or control mimic was determined using a CytoSelect 24-well cell invasion assay kit. The invading cells were stained, lysed, and quantified by measuring optical density (OD) at 560 nm.

**Figure S6**

miR-296-5p affected 5-FU-induced apoptosis in MIA PaCa-2 cells. Caspase-9 and cleaved caspase-9 were detected by Western blotting in MIA PaCa-2 cells transfected with miR-296-5p or control miRNA mimic (NC) treated with 5-fluorouracil (5-FU). MIA PaCa-2 cells were transfected with miR-296-5p or control mimic and incubated with 100 M 5-FU. The cells were then lysed and Western blot analysis was performed as described in Materials and Methods. BOK protein was analyzed using the same samples. -actin was used as a control. MW; molecular weight.

**Figure S7**

miR-296-5p affected GEM-induced apoptosis in PANC-1 cells. Caspase-9 and cleaved caspase-9 were detected by Western blotting in PANC-1 cells transfected with miR-296-5p or control miRNA mimic (NC) treated with gemcitabine (GEM). PANC-1 cells were transfected with miR-296-5p or control mimic and incubated with 30 M GEM. The cells were then lysed and Western blot analysis was performed as described in Materials and Methods. BOK protein was analyzed using the same samples. -actin was used as a control. MW; molecular weight.
